# Supplementary material
Source: publisher figshare collection journal article supplement (https://karger.figshare.com/articles/dataset/_/5104447)
Supplement: Supplementary file 1 [file 1]

**Table 3.** Description and number of unique clones belonging to the same Unigene cluster

| Gene symbol   | Gene description                                                                                     | Unigene ID            | Number of unique clones <sup>1</sup> |
|---------------|------------------------------------------------------------------------------------------------------|-----------------------|--------------------------------------|
| 1300018P11Rik | RIKEN cDNA 1300018P11 gene                                                                           | Mm.32889              | 2                                    |
| 1810011E08Rik | RIKEN cDNA 1810011E08 gene                                                                           | Mm.86437              | 4                                    |
| 2310012M18Rik | RIKEN cDNA 2310012M18 gene                                                                           | Mm.41438              | 2                                    |
| 3930401E15Rik | RIKEN cDNA 3930401E15 gene                                                                           | Mm.296043             | 2                                    |
| 4732418C07Rik | RIKEN cDNA 4732418C07 gene                                                                           | Mm.283565             | 3                                    |
| Acbd5         | Acyl-coenzyme-A-binding-domain-containing 5                                                          | Mm.181973             | 2                                    |
| Acp1          | Acid phosphatase 1, soluble                                                                          | Rn.4226               | 2                                    |
| Actb          | Actin, $\beta$                                                                                       | Rn.94978              | 2                                    |
| Actr2         | Actr2: ARP2 actin-related protein 2 homolog (yeast)                                                  | Mm.259045             | 3                                    |
| Add3          | Adducin 3 ( $\gamma$ )                                                                               | Mm.44106              | 3                                    |
| AFURS1        | ATPase family homolog upregulated in senescence cells                                                | Hs.371148             | 2                                    |
| Ak3l          | Adenylate-kinase-3 $\alpha$ -like                                                                    | Mm.196067             | 2                                    |
| Aldoa         | Aldolase A                                                                                           | Rn.1774               | 2                                    |
| Alg2          | Asparagine-linked glycosylation 2 homolog (yeast, $\alpha$ -1,3-mannosyltransferase)                 | Mm.22218              | 2                                    |
| Ank2          | Ankyrin 2, brain, implicated in development of long QT syndrome (Jervell and Lange-Nielsen syndrome) | Mm.220242             | 3                                    |
| Anxa7         | Annexin A7, Ca <sup>2+</sup> -binding protein, Ca <sup>2+</sup> -signaling process                   | Rn.106184             | 2                                    |
| Araf1         | v- <i>raf</i> murine sarcoma 3611 viral oncogene homolog 1                                           | Rn.1714               | 2                                    |
| Arhgap5       | $\rho$ -GTPase-activating protein 5                                                                  | Mm.35059              | 2                                    |
| Arhgef12      | $\rho$ -Guanine nucleotide exchange factor (GEF) 12                                                  | Mm.275266, (Hs.24598) | 2                                    |
| Arl10c        | Arl10c: ADP-ribosylation-factor-like 10C                                                             | Mm.271178             | 2                                    |
| Asah2         | N-acylsphingosine amidohydrolase 2                                                                   | Mm.104900             | 2                                    |
| Asf1a         | ASF1 antisilencing function 1 homolog A ( <i>Saccharomyces cerevisiae</i> )                          | Mm.272989             | 3                                    |
| Asph          | Aspartate- $\beta$ -hydroxylase                                                                      | Mm.239247             | 2                                    |
| Atp2a2        | ATPase, Ca <sup>2+</sup> -transporting, cardiac muscle, slow twitch 2                                | Rn.2305               | 2                                    |
| BC002236      | cDNA sequence BC002236                                                                               | Mm.281245             | 2                                    |
| Bet1          | Blocked early in transport 1 homolog ( <i>Saccharomyces cerevisiae</i> )                             | Rn.3953               | 2                                    |
| Bmi1          | B lymphoma Mo-MLV insertion region 1                                                                 | Mm.289584             | 2                                    |
| Bpnt1         | 3(2),5-bisphosphate nucleotidase                                                                     | Rn.8453               | 2                                    |
| Bteb1         | Basic transcription-element-binding protein 1                                                        | Mm.291595             | 2                                    |
| C80913        | C80913: expressed sequence C80913; human homolog PREFOLDIN                                           | Mm.23997              | 2                                    |
| Cab39         | Calcium-binding protein 39                                                                           | Mm.26135              | 3                                    |
| Cbx3          | Chromobox homolog 3 ( <i>Drosophila</i> HP1 $\gamma$ )                                               | Mm.344182             | 2                                    |
| Ccni          | Cyclin I                                                                                             | Mm.250419             | 2                                    |
| Cd24          | CD24 antigen                                                                                         | Rn.6007               | 2                                    |
| Cd81          | CD81 antigen                                                                                         | Rn.1975               | 2                                    |
| Cfh           | Complement component factor h                                                                        | Rn.101777             | 2                                    |
| Cfl2          | Cofilin 2, muscle                                                                                    | Mm.276826             | 2                                    |
| CHN1          | chimerin (chimaerin) 1                                                                               | Rn.11166              | 3                                    |
| Chpt1         | Choline phosphotransferase 1                                                                         | Mm.288897             | 2                                    |
| Clcn2         | Chloride channel 2                                                                                   | Rn.11073              | 3                                    |
| Cltb          | Clathrin, light polypeptide (Lcb)                                                                    | Rn.3440               | 2                                    |
| Cox7a2        | Cytochrome c oxidase, subunit VIIa 2                                                                 | Mm.3819               | 5                                    |
| Cpsf6         | Cleavage and polyadenylation-specific factor 6                                                       | Mm.288682             | 2                                    |
| Crhr1         | Corticotropin-releasing hormone receptor 1                                                           | Rn.10499              | 2                                    |
| Cript         | Postsynaptic protein Cript                                                                           | Rn.30508              | 2                                    |
| Cugbp2        | CUG triplet repeat, RNA-binding protein 2                                                            | Mm.147091             | 2                                    |
| Ddx3x         | DEAD/H (Asp-Glu-Ala-Asp/His) box polypeptide 3, X-linked                                             | Mm.289662             | 2                                    |
| Dlat          | Dihydrolipoamide acetyltransferase                                                                   | Rn.15413              | 3                                    |
| DUSP21        | Dual specificity phosphatase 21                                                                      | Hs.201790             | 2                                    |
| Ecac1         | Epithelial calcium channel 1                                                                         | Rn.12948              | 2                                    |
| Edg1          | Endothelial differentiation sphingolipid G-protein-coupled receptor 1                                | Mm.982                | 2                                    |
| Eea1          | Early endosome antigen                                                                               | Mm.210035             | 2                                    |
| Eif5a2        | Eukaryotic translation initiation factor 5A2                                                         | Mm.193670             | 2                                    |
| Elavl1        | ELAV (embryonic lethal, abnormal vision, <i>Drosophila</i> )-like 1 (human antigen R)                | Mm.119162             | 2                                    |
| Esp           | Osteotesticular phosphatase – ESP                                                                    | Rn.10048              | 2                                    |
| Fac16         | Fatty acid coenzyme A ligase, long chain 6                                                           | Rn.33697              | 2                                    |
| Fgf12         | Fibroblast growth factor 12                                                                          | Mm.7996               | 5                                    |
| G6pdx         | Glucose-6-phosphate dehydrogenase                                                                    | Rn.11040              | 2                                    |
| Gab1          | Growth-factor-receptor-bound-protein-2-associated protein 1                                          | Mm.277409             | 2                                    |
| Galnt1        | UDP-N-acetyl- $\alpha$ -D-galactosamine:polypeptide N-acetylgalactosaminyltransferase 1              | Mm.30249              | 2                                    |
| Gbe1          | Glucan (1,4- $\alpha$ -), branching enzyme 1                                                         | Mm.29201              | 2                                    |

**Table 3** (continued)

| Gene symbol | Gene description                                                                                                   | Unigene ID | Number of unique clones <sup>1</sup> |
|-------------|--------------------------------------------------------------------------------------------------------------------|------------|--------------------------------------|
| Gls         | Glutaminase                                                                                                        | Rn.5762    | 3                                    |
| Got1        | Glutamate oxaloacetate transaminase 1                                                                              | Rn.5819    | 2                                    |
| Gpi         | Glucose phosphate isomerase                                                                                        | Rn.84435   | 2                                    |
| Heph        | Hephaestin                                                                                                         | Rn.43849   | 2                                    |
| Hfe         | Hemochromatosis                                                                                                    | Rn.42931   | 2                                    |
| Igsf4a      | Immunoglobulin superfamily, member 4A                                                                              | Mm.307293  | 2                                    |
| Kidins220   | Kinase-D-interacting substance of 220 kDa                                                                          | Rn.16792   | 2                                    |
| KLHL7       | Kelch-like 7                                                                                                       | Mm.273768  | 2                                    |
| Lamc1       | Laminin, $\gamma$ 1                                                                                                | Mm.1249    | 2                                    |
| Lamp2       | Lysosomal membrane glycoprotein 2                                                                                  | Rn.1722    | 2                                    |
| Lap1c       | Plasia <i>ras</i> -related homolog A2                                                                              | Rn.107401  | 2                                    |
| Lats2       | Large tumor suppressor 2                                                                                           | Mm.347899  | 2                                    |
| Lpin1       | Lipin 1                                                                                                            | Mm.153625  | 2                                    |
| MAF2        | A230103N10Rik RIKEN cDNA; human homolog - MAF2                                                                     | Mm.247113  | 3                                    |
| Mina        | Myc-induced nuclear antigen                                                                                        | Mm.7760    | 2                                    |
| Mtap4       | Microtubule-associated protein 4                                                                                   | Mm.217318  | 2                                    |
| Myliip      | Myosin-regulatory light-chain-interacting protein                                                                  | Mm.212855  | 2                                    |
| Mynn        | Myoneurin                                                                                                          | Mm.200378  | 2                                    |
| Nap112      | Nucleosome assembly protein-1-like 2                                                                               | Mm.347470  | 2                                    |
| Nedd4a      | Neural-precursor-cell-expressed, developmentally downregulated gene 4A                                             | Rn.99540   | 2                                    |
| Npr3        | Natriuretic peptide receptor 3                                                                                     | Mm.57219   | 2                                    |
| NUCKS       | 8430423A01Rik: RIKEN cDNA 8430423A01 gene                                                                          | Mm.246869  | 2                                    |
| Orp150      | Oxygen-regulated protein (150 kDa)                                                                                 | Rn.10542   | 3                                    |
| Paip2       | Polyadenylate-binding-protein-interacting protein 2                                                                | Mm.126534  | 2                                    |
| Pdk4        | Pyruvate dehydrogenase kinase, isoenzyme 4                                                                         | Mm.235547  | 2                                    |
| Pecr        | Peroxisomal 2-enoyl-CoA reductase                                                                                  | Rn.19267   | 2                                    |
| Peli2       | Pellino 2                                                                                                          | Mm.296457  | 2                                    |
| Plp         | Proteolipid protein, modulates viability and phenotype of neurons                                                  | Rn.4550    | 8                                    |
| Pold3       | Polymerase (DNA-directed), $\delta$ 3, accessory subunit                                                           | Mm.37562   | 2                                    |
| Ppp2ca      | Ppp2ca, protein phosphatase 2a, catalytic subunit, $\alpha$ -isoforms                                              | Rn.1271    | 3                                    |
| Ppp2r5c     | Protein phosphatase 2, regulatory subunit B (B56), $\gamma$ -isoforms                                              | Mm.240396  | 2                                    |
| PREI3       | RGD:620183, preimplantation protein 3                                                                              | Rn.12262   | 2                                    |
| Ptb         | Polypyrimidine-tract-binding protein                                                                               | Rn.64440   | 2                                    |
| Ptprc       | Protein tyrosine phosphatase, receptor type, C                                                                     | Mm.143846  | 2                                    |
| Ptpcd       | Protein tyrosine phosphatase, receptor type, D                                                                     | Mm.184021  | 2                                    |
| RAP-1A      | Ras-related protein RAP-1A                                                                                         | Rn.106321  | 2                                    |
| Rnase4      | Ribonuclease, RNase A family 4                                                                                     | Rn.1742    | 2                                    |
| Rnfl3       | Ring finger protein 13                                                                                             | Mm.274360  | 2                                    |
| Rnf4        | Ring finger protein 4                                                                                              | Mm.21281   | 2                                    |
| Rngtt       | RNA guanylyltransferase and 5'-phosphatase                                                                         | Mm.26153   | 2                                    |
| Rnp24       | Coated vesicle membrane protein                                                                                    | Rn.1022    | 2                                    |
| Sdcbp       | Syntenin, anchors AMPA receptor to cell membrane                                                                   | Rn.4309    | 2                                    |
| Sept2       | Septin 2                                                                                                           | Mm.242324  | 2                                    |
| Sfrs10      | Splicing factor, arginine/serine-rich (transformer 2 <i>Drosophila</i> homolog) 10                                 | Rn.8538    | 2                                    |
| Sfrs5       | Splicing factor, arginine/serine-rich 5                                                                            | Rn.54448   | 2                                    |
| Sgpp1       | Sphingosine-1-phosphate phosphatase 1                                                                              | Mm.280199  | 2                                    |
| Sirt1       | Sirtuin 1 (silent mating type information regulation 2, homolog) 1<br>( <i>Saccharomyces cerevisiae</i> )          | Rn.42098   | 2                                    |
| Six1        | Sine-oculis-related homeobox 1 homolog                                                                             | Mm.4645    | 2                                    |
| Skil        | SKI-like, ski is a unique proto-oncoprotein                                                                        | Mm.15406   | 2                                    |
| Slc22a6     | Solute carrier family 22, member 6                                                                                 | Rn.87849   | 2                                    |
| SLCO3A1     | Solute carrier organic anion transporter family, member 3A1                                                        | Hs.113657  | 2                                    |
| SNN         | Stannin                                                                                                            | Rn.6147    | 2                                    |
| Snx9        | Sorting nexin 9                                                                                                    | Mm.89515   | 2                                    |
| Spin        | Spindlin                                                                                                           | Mm.188432  | 2                                    |
| Ssr3        | Ssr3: TRAP-complex $\gamma$ -subunit                                                                               | Rn.3264    | 5                                    |
| STRAP       | Similar to UNR-interacting protein [serine-threonine-kinase-receptor-associated protein (STRAP)] (LOC297699), mRNA | Hs.504895  | 2                                    |

**Table 3** (continued)

| Gene symbol | Gene description                                                                                | Unigene ID | Number of unique clones <sup>1</sup> |
|-------------|-------------------------------------------------------------------------------------------------|------------|--------------------------------------|
| Tnfrsf11b   | Tumor necrosis factor receptor superfamily, member 11b (osteoprotegerin)                        | Mm.15383   | 2                                    |
| Trappc2     | Trafficking protein particle complex 2                                                          | Mm.279752  | 2                                    |
| Trpc3       | Transient receptor protein 3                                                                    | Rn.45385   | 2                                    |
| Txndc1      | Thioredoxin-domain-containing 1                                                                 | Mm.204670  | 2                                    |
| Usp32       | Ubiquitin-specific protease 32                                                                  | Mm.178524  | 4                                    |
| Vapa        | Lamina-associated polypeptide 1C                                                                | Rn.11373   | 2                                    |
| Vcl         | Vinculin                                                                                        | Mm.279361  | 2                                    |
| Vps35       | Vacuolar protein sorting 35                                                                     | Rn.8419    | 3                                    |
| Xpr1        | Xenotropic and polytropic retrovirus receptor 1                                                 | Mm.266215  | 2                                    |
| Ywhae       | Tyrosine 3-monooxygenase/tryptophan 5-monooxygenase activation protein, $\epsilon$ -polypeptide | Rn.4225    | 2                                    |
| Zdhc2       | Zinc finger, DHHC-domain-containing 2                                                           | Mm.34326   | 2                                    |
| Zfp36l1     | Zinc finger protein 36, C3H-type-like 1                                                         | Rn.6142    | 2                                    |
| ZFR         | Zinc finger RNA-binding protein                                                                 | Mm.273496  | 2                                    |

<sup>1</sup> Number of clones that were assigned a unique Genbank accession number that corresponded to a single Unigene cluster.
