# Supplementary material
Source: publisher figshare collection journal article supplement (https://karger.figshare.com/articles/dataset/_/5104447)
Supplement: Supplementary file 2 [file 1]

**Table 2.** Genes identified in the Wackym-Soares normalized rat vestibular periphery cDNA library with GO terms and organized by function

| Gene symbol                                                                   | Description                                                                                                                               | Unigene cluster | Genbank accession No. |
|-------------------------------------------------------------------------------|-------------------------------------------------------------------------------------------------------------------------------------------|-----------------|-----------------------|
| <i>Genes associated with synaptic mechanisms</i>                              |                                                                                                                                           |                 |                       |
| Agrrn                                                                         | Agrin, associated with the aggregation of nicotinic receptor subunits                                                                     | Rn.112106       | CX569919              |
| Amph1                                                                         | Amphiphysin                                                                                                                               | Rn.44463        | CX570801              |
| BEGAIN                                                                        | Brain-enriched guanylate-kinase-associated                                                                                                | Rn.30036        | CX569284              |
| Chn2                                                                          | Chimerin (chimaerin) 2                                                                                                                    | Rn.10521        | CX569858              |
| Cltb                                                                          | Clathrin, light polypeptide (Lcb), synaptic vesicle protein                                                                               | Rn.3440         | CX569624,<br>CX571033 |
| Colq                                                                          | Collagen-like tail subunit (single strand of homotrimer) of asymmetric acetylcholinesterase, associated with efferent cholinergic synapse | Rn.87303        | CX570499              |
| Cript                                                                         | Postsynaptic protein Cript                                                                                                                | Rn.30508        | CX569283,<br>CX569721 |
| Dlg2                                                                          | Disks, large homolog 2 ( <i>Drosophila</i> )                                                                                              | Rn.53628        | CX569439              |
| Eea1                                                                          | Early endosome antigen, associated with early internalization events linked to G-protein-coupled receptors                                | Mm.210035       | CX570527              |
| Ehd4                                                                          | Pincher, pinocytic chaperone for NGF/TrkA signaling endosomes                                                                             | Rn.7379         | CX569848              |
| Gabra1                                                                        | $\gamma$ -Aminobutyric acid (GABA-A) receptor, subunit $\alpha$ 1                                                                         | Mm.338713       | CX569130              |
| Mlp                                                                           | MARCKS-like protein                                                                                                                       | Rn.2486         | CX569544              |
| Myo5a                                                                         | Myosin Va, trafficking of intracellular vesicles and found in afferent calyces                                                            | Rn.44865        | CX570645              |
| Nrxn1                                                                         | Neurexin I, transmembrane scaffolding protein at nodes of Ranvier                                                                         | Rn.86517        | CX569595              |
| Rnp24                                                                         | Coated vesicle membrane protein                                                                                                           | Rn.1022         | CX570172              |
| Scg2                                                                          | Secretogranin II                                                                                                                          | Rn.45602        | CX570820              |
| Scg3                                                                          | Secretogranin III, neuron-specific acidic secretory protein                                                                               | Rn.11093        | CX570837              |
| SNAP25                                                                        | Synaptosomal-associated protein (human)                                                                                                   | Rn.107689       | CX569379              |
| Strn                                                                          | Striatin, calmodulin-dependent scaffolding protein, binds calveolin 1                                                                     | Rn.37469        | CX569252,<br>CX570666 |
| Gs2na                                                                         | Striatin, calmodulin-binding protein 3                                                                                                    | Rn.8394         | CX569252              |
| Sv2a                                                                          | Synaptic vesicle glycoprotein 2a                                                                                                          | Rn.11264        | CX569269              |
| Ush3a                                                                         | Usher syndrome type III (clarin 1)                                                                                                        | Rn.57072        | CX571115              |
| Vamp4                                                                         | Vesicle-associated membrane protein 4                                                                                                     | Mm.10699        | CX570325              |
| Vapa                                                                          | Vesicle-associated membrane protein, associated protein a                                                                                 | Rn.17540        | CX570430              |
| <i>Genes associated with cell surface receptor-linked signal transduction</i> |                                                                                                                                           |                 |                       |
| Antxr1                                                                        | Anthrax toxin receptor 1                                                                                                                  | Rn.105486       | CX571075              |
| Araf1                                                                         | v-raf murine sarcoma 3611 viral oncogene homolog 1                                                                                        | Rn.1714         | CX570800,<br>CX570953 |
| Argbp2                                                                        | Arg/Abl-interacting protein ArgBP2                                                                                                        | Rn.24612        | CX570422              |
| Arhgap20                                                                      | p-GTPase activating protein 20                                                                                                            | Mm.26150        | CX570546              |
| Brd8                                                                          | Bromodomain-containing 8                                                                                                                  | Mm.45602        | CX569950              |
| Crhr1                                                                         | Corticotropin-releasing hormone receptor 1                                                                                                | Rn.10499        | CX570557              |
| CSNK1A1                                                                       | Casein kinase I, $\alpha$ 1                                                                                                               | Rn.23810        | CX570917              |
| Csnk2a1                                                                       | Casein kinase II, $\alpha$ 1-polypeptide                                                                                                  | Rn.4231         | CX569772              |
| Ctf1                                                                          | Cardiotrophin 1                                                                                                                           | Rn.10253        | CX570114              |
| Ddr1                                                                          | Discoidin domain receptor family, member 1                                                                                                | Rn.7807         | CX569832              |
| DTR                                                                           | Diphtheria toxin receptor                                                                                                                 | Rn.10148        | CX569129              |
| Eif4ebp2                                                                      | Eukaryotic-translation-initiation-factor-4E-binding protein 2                                                                             | Mm.250329       | CX571116              |
| F2r                                                                           | Coagulation factor II receptor                                                                                                            | Rn.2609         | CX569291              |
| Fbxw7                                                                         | F box and WD-40 domain protein 7, archipelago homolog ( <i>Drosophila</i> )                                                               | Mm.196475       | CX570010              |
| Glud1                                                                         | Glutamate dehydrogenase 1                                                                                                                 | Rn.55106        | CX570338              |
| Gna13                                                                         | Guanine-nucleotide-binding protein, $\alpha$ 13                                                                                           | Mm.193925       | CX569411              |
| Gnai1                                                                         | Guanine-nucleotide-binding protein, $\alpha$ -inhibiting 1                                                                                | Rn.11391        | CX570117              |
| Gnb1                                                                          | Guanine-nucleotide-binding protein, $\beta$ 1                                                                                             | Rn.7106         | CX569538              |
| Gng12                                                                         | Guanine-nucleotide-binding protein (G protein), $\gamma$ 12                                                                               | Rn.17099        | CX569762              |
| GPR126                                                                        | G-protein-coupled receptor 126                                                                                                            | Hs.318894       | CX570324              |

**Table 2** (continued)

| Gene symbol                                                  | Description                                                                                                        | Unigene cluster | Genbank accession No.        |
|--------------------------------------------------------------|--------------------------------------------------------------------------------------------------------------------|-----------------|------------------------------|
| Gpr81                                                        | G-protein-coupled receptor 81                                                                                      | Mm.33362        | CX570202                     |
| Gpr88                                                        | G-protein-coupled receptor 88                                                                                      | Rn.59513        | CX570233                     |
| Gsk3b                                                        | Glycogen synthase kinase 3 $\beta$                                                                                 | Rn.10426        | CX569788                     |
| Igsf4a                                                       | Immunoglobulin superfamily, member 4A                                                                              | Mm.234832       | CX569788                     |
| Lancl1                                                       | LanC (bacterial lantibiotic synthetase component C)-like 1                                                         | Rn.38972        | CX569807                     |
| Lphn2                                                        | Latrophilin 2                                                                                                      | Rn.12089        | CX569322                     |
| LPHN3                                                        | Latrophilin 3                                                                                                      | Rn.17279        | CX569282                     |
| Lrp6                                                         | Low-density-lipoprotein-receptor-related protein 6                                                                 | Mm.9776         | CX569847                     |
| Ltbp4                                                        | Latent-transforming-growth-factor- $\beta$ -binding protein 4                                                      | Mm.272251       | 27192755                     |
| Lynx1                                                        | Ly6/neurotoxin 1                                                                                                   | Mm.257067       | CX570354                     |
| Madh4                                                        | MAD homolog 4 ( <i>Drosophila</i> )                                                                                | Rn.9774         | CX570506                     |
| Mist1                                                        | Muscle, intestine and stomach expression 1                                                                         | Rn.9897         | CX570103                     |
| Npr3                                                         | Natriuretic peptide receptor 3                                                                                     | Rn.11297        | CX570752, CX570753           |
| Omg                                                          | Oligodendrocyte myelin glycoprotein (Omg)                                                                          | Rn.11850        | CX569917                     |
| Osmr                                                         | Oncostatin M receptor                                                                                              | Rn.92110        | CX571126                     |
| Pace4                                                        | Subtilisin-like endoproteases                                                                                      | Rn.950          | CX570107                     |
| Pde1a                                                        | Phosphodiesterase 1A, calmodulin-dependent                                                                         | Rn.94981        | CX569606                     |
| Peli2                                                        | Pellino 2                                                                                                          | Rn.60323        | CX570251                     |
| Pkd1                                                         | Polycystic kidney disease 1 homolog                                                                                | Rn.64559        | CX569928                     |
| PLA2G3                                                       | Phospholipase A <sub>2</sub> , group III                                                                           | Hs.149623       | CX571008                     |
| Ptpcr                                                        | Protein tyrosine phosphatase, receptor type, C                                                                     | Rn.90166        | CX570195, CX571080           |
| Ptpcd                                                        | Protein tyrosine phosphatase, receptor type, D                                                                     | Rn.91202        | CX569120, CX569743           |
| Ptpg                                                         | Protein tyrosine phosphatase, receptor type, G                                                                     | Rn.87083        | CX569151                     |
| Ptpkr                                                        | Protein tyrosine phosphatase, receptor type, K                                                                     | Mm.332303       | CX569971                     |
| Ptpzr1                                                       | Protein tyrosine phosphatase, receptor type, Z polypeptide 1                                                       | Rn.10088        | CX569387                     |
| Ralgsd                                                       | Ras association (RalGDS/AF-6) domain family 4 (mouse), <i>ral</i> guanine nucleotide dissociation stimulator (rat) | Rn.40174        | CX569767                     |
| Rassf4                                                       | Ras association (RalGDS/AF-6) domain family 4                                                                      | Mm.257931       | CX569309                     |
| Rgs7                                                         | Regulator of G protein signaling 7                                                                                 | Rn.21234        | CX569526                     |
| Sfrp1                                                        | Secreted frizzled-related sequence protein 1                                                                       | Rn.34957        | CX570712                     |
| Sik2                                                         | Salt-inducible kinase 2, upregulated in high-salt-diet-fed rats                                                    | Mm.38316        | CX570370                     |
| ST7                                                          | Suppression of tumorigenicity 7                                                                                    | Hs.368131       | CX570584                     |
| STRAP                                                        | Similar to UNR-interacting protein [serine-threonine-kinase-receptor-associated protein (STRAP)]                   | Hs.504895       | CX570661                     |
| Tcf7                                                         | Transcription factor 7, T-cell specific                                                                            | Mm.31630        | CX569558                     |
| Tiam1                                                        | T-cell lymphoma invasion and metastasis 1                                                                          | Rn.38763        | CX570615                     |
| Tob1                                                         | Transducer of ERBB2, 1                                                                                             | Rn.7819         | CX570708                     |
| Wnt5a                                                        | Wingless-related MMTV integration site 5A                                                                          | Rn.48749        | CX569760                     |
| <i>Genes associated with intracellular signaling cascade</i> |                                                                                                                    |                 |                              |
| Add3                                                         | Adducin 3 ( $\gamma$ )                                                                                             | Rn.76589        | CX569139, CX569167, CX570063 |
| Arf3                                                         | ADP ribosylation factor 3                                                                                          | Rn.106440       | CX570112                     |
| Arhgap5                                                      | $\rho$ -GTPase-activating protein 5                                                                                | Mm.35059        | CX570052, CX570317           |
| ARHGEF12                                                     | $\rho$ -Guanine nucleotide exchange factor (GEF) 12                                                                | Hs.24598        | CX569801, CX570379           |
| Arl1                                                         | ADP-ribosylation-factor-like 1                                                                                     | Rn.3065         | CX570254                     |
| Brp                                                          | BRCA1-associated protein                                                                                           | Mm.153372       | CX570829                     |
| Btk                                                          | Bruton agammaglobulinemia tyrosine kinase                                                                          | Mm.4475         | CX569144                     |

**Table 2** (continued)

| Gene symbol | Description                                                                                         | Unigene cluster | Genbank accession No.        |
|-------------|-----------------------------------------------------------------------------------------------------|-----------------|------------------------------|
| Cab39       | Calcium-binding protein 39                                                                          | Mm.26135        | CX569334, CX569455, CX570985 |
| Calb2       | Calbindin 2 (calretinin)                                                                            | Rn.10321        | CX569239                     |
| Camlg       | Calcium-modulating ligand                                                                           | Rn.63999        | CX569118                     |
| Cdc42       | Cell division cycle 42 homolog ( <i>Saccharomyces cerevisiae</i> ), Cdc42 GTPase-activating protein | Rn.60067        | CX570916                     |
| Cdgap       | Cdc42 GTPase-activating protein                                                                     | Mm.268397       | CX569953                     |
| CHN1        | Chimerin (chimaerin) 1                                                                              | Rn.11166        | CX570159                     |
| Chp         | Calcium-binding protein p22                                                                         | Rn.11041        | CX570980                     |
| Cipp        | Channel-interacting PDZ domain protein                                                              | Mm.90218        | CX569542                     |
| Crk         | v- <i>crk</i> sarcoma virus CT10 oncogene homolog (avian)                                           | Rn.96136        | CX569340                     |
| Dixdc1      | DIX domain containing 1                                                                             | Mm.82598        | CX570060                     |
| Dmd         | Dystrophin, muscular dystrophy                                                                      | Rn.10307        | CX570612                     |
| DUSP21      | Dual specificity phosphatase 21                                                                     | Hs.534478       | CX569877, CX570240           |
| Eif4ebp2    | Eukaryotic-translation-initiation-factor-4E-binding protein 2                                       | Mm.250329       | CX571116                     |
| ERBB2IP     | ErbB2-interacting protein                                                                           | Hs.519346       | CX569874                     |
| FRK         | Src-related tyrosine kinase (mouse or human)                                                        | Rn.10556        | CX569559                     |
| Fstl1       | Follistatin-like 1                                                                                  | Rn.95652        | CX570462                     |
| Gab1        | Growth-factor-receptor-bound-protein-2-associated protein 1                                         | Mm.277409       | CX569812, CX571056           |
| Gdap1       | Ganglioside-induced differentiation-associated protein 1                                            | Mm.18218        | CX570490, CX570961           |
| Gna13       | Guanine-nucleotide-binding protein, $\alpha$ 13                                                     | Mm.193925       | CX569411                     |
| Gnb1        | Guanine-nucleotide-binding protein, $\beta$ 1                                                       | Rn.7106         | CX569538                     |
| Hpcal1      | Hippocalcin-like 1                                                                                  | Mm.20937        | CX570539                     |
| Inpp5b      | Inositol polyphosphate 5 phosphatase B                                                              | Mm.296202       | CX570307                     |
| Mapk8ip2    | Mitogen-activated protein kinase 8 interacting protein 2                                            | Mm.173337       | CX569486, CX569487           |
| MAPK8IP3    | Mitogen-activated protein kinase 8 (human or mouse)                                                 | Hs.207763       | CX569515                     |
| Mpp2        | Membrane protein, palmitoylated 2 (MAGUK p55 subfamily member 2)                                    | Rn.44271        | CX569948                     |
| Mras        | Muscle and microspikes RAS                                                                          | Rn.10641        | CX570003                     |
| Nrbp        | Nuclear-receptor-binding protein                                                                    | Mm.292040       | CX570780                     |
| Pik3cg      | Phosphoinositide 3 kinase, catalytic, $\gamma$ -polypeptide                                         | Rn.109583       | CX570088                     |
| Pkd1        | Polycystic kidney disease 1 homolog                                                                 | Rn.64559        | CX569928                     |
| Pkd2        | Polycystic kidney disease 2                                                                         | Mm.6442         | CX571081                     |
| Ppp2r5c     | Protein phosphatase 2, regulatory subunit B (B56), $\gamma$ -isoforms                               | Rn.2153         | CX569386, CX569914           |
| Prkce       | Protein kinase C, $\epsilon$                                                                        | Rn.34966        | CX569223                     |
| PSEN2       | Presenilin 2                                                                                        | Rn.11045        | CX569546                     |
| Rab1        | RAB1, member RAS oncogene family (mouse), <i>ras</i> -related protein (rat)                         | Rn.106743       | CX569849                     |
| Rab12       | RAB12, member RAS oncogene family                                                                   | Rn.11021        | CX570389                     |
| Rab21       | RAB21, member RAS oncogene family                                                                   | Rn.13001        | CX570891                     |
| RAB2B       | RAB2B, member RAS oncogene family                                                                   | Hs.22399        | CX570798                     |
| Rab33b      | RAB33B, member RAS oncogene family                                                                  | Mm.1664         | CX570148                     |
| RAB6B       | RAB6B, member RAS oncogene family                                                                   | Hs.147164       | CX570372                     |
| Rab7        | RAB7, member RAS oncogene family                                                                    | Rn.1425         | CX569615                     |
| Raf1        | Murine leukemia viral (v- <i>raf</i> -1) oncogene homolog 1 (3611-MSV)                              | Rn.33262        | CX570533                     |
| Ralgds      | Ral guanine nucleotide dissociation stimulator (rat)                                                | Rn.40174        | CX569767                     |
| Ran         | RAN, member RAS oncogene family                                                                     | Rn.107698       | CX571034                     |
| Rangap1     | RAN GTPase-activating protein 1                                                                     | Mm.270975       | CX570737                     |
| Rap1ga1     | Rap1, GTPase-activating protein 1                                                                   | Mm.180763       | CX569521                     |
| Rap2c       | RAP2C, member RAS oncogene family                                                                   | Rn.101524       | CX570493                     |
| Rasa1       | RAS p21 protein activator 1                                                                         | Rn.12223        | CX570623                     |

**Table 2** (continued)

| Gene symbol                                                | Description                                                                                                   | Unigene cluster | Genbank accession No. |
|------------------------------------------------------------|---------------------------------------------------------------------------------------------------------------|-----------------|-----------------------|
| Rgs7                                                       | Regulator of G protein signaling 7                                                                            | Rn.21234        | CX569526              |
| Rheb                                                       | Ras homolog enriched in brain                                                                                 | Rn.859          | CX569676              |
| Rhoa                                                       | $\rho$ -Family GTPase, p15 <sup>ras</sup> -related homolog A2, alias Arha2                                    | Rn.107401       | CX569978, CX570151    |
| Rhot1                                                      | Ras homolog gene family, member T1                                                                            | Mm.261491       | CX569462              |
| Rock2                                                      | $\rho$ -Associated coiled-coil-forming kinase 2                                                               | Rn.88642        | CX569752              |
| Sdcbp                                                      | Syntenin, anchors AMPA receptor to cell membrane                                                              | Rn.4309         | CX570890, CX571093    |
| SH3BP5                                                     | SH3 domain binding protein 5 (BTK-associated)                                                                 | Rn.28667        | CX570234              |
| Slc9a3r2                                                   | Solute carrier family 9 (sodium/hydrogen exchanger), isoform 3 regulator 2                                    | Rn.39351        | CX570896              |
| Smoc1                                                      | SPARC-related modular calcium binding 1                                                                       | Rn.55639        | CX569541              |
| Snag1                                                      | Sorting-nexin-associated Golgi protein 1                                                                      | Mm.33721        | CX570588              |
| Snx1                                                       | Sorting nexin 1                                                                                               | Rn.2785         | CX571038              |
| Snx10                                                      | Sorting nexin 10                                                                                              | Mm.294166       | CX570331              |
| Snx15                                                      | Sorting nexin 15                                                                                              | Mm.329629       | CX569431              |
| Snx4                                                       | Sorting nexin 4                                                                                               | Mm.28196        | CX570764              |
| Snx9                                                       | Sorting nexin 9                                                                                               | Mm.89515        | CX570161, CX570795    |
| Sos2                                                       | Son of sevenless homolog 2 ( <i>Drosophila</i> )                                                              | Mm.3770         | CX570160              |
| Spag9                                                      | Sperm-associated antigen 9                                                                                    | Mm.260737       | CX569461              |
| Stat5b                                                     | Signal transducer and activator of transcription 5B                                                           | Rn.54486        | CX569699              |
| Stmn2                                                      | Stathmin-like 2                                                                                               | Rn.34335        | CX570698              |
| Tiam1                                                      | Cell lymphoma invasion and metastasis 1                                                                       | Rn.38763        | CX570615              |
| Wsb1                                                       | WD repeat and SOCS box-containing 1                                                                           | Mm.307022       | CX570613              |
| Ywhae                                                      | Tyrosine 3-monooxygenase/tryptophan 5-monooxygenase activation protein, $\epsilon$ -polypeptide               | Rn.4225         | CX569647, CX570618    |
| Ywhag                                                      | Tyrosine 3-monooxygenase/tryptophan 5-monooxygenase activation protein, $\gamma$ -polypeptide                 | Rn.29936        | CX569658              |
| <i>Genes associated with transport and/or ion channels</i> |                                                                                                               |                 |                       |
| Abca8a                                                     | ATP-binding cassette, subfamily A (ABC1), member 8a                                                           | Mm.344148       | CX570766              |
| Abcb10                                                     | ATP-binding cassette, subfamily B (MDR/TAP), member 10                                                        | Mm.274243       | CX569475              |
| Abcd2                                                      | ATP-binding cassette, subfamily D (ALD), member 2                                                             | Rn.19678        | CX569603              |
| AFURS1                                                     | ATPase family homolog upregulated in senescence cells                                                         | Hs.529609       | CX569209, CX569338    |
| Ap1g1                                                      | Adaptor protein complex AP-1, $\gamma$ 1-subunit                                                              | Rn.9446         | CX570904              |
| Ap3d1                                                      | Adaptor-related protein complex 3, $\delta$ -subunit                                                          | Mm.209294       | CX571094              |
| App                                                        | Golgi-associated PDZ and coiled-coil-motif-containing                                                         | Rn.2104         | CX570008              |
| Appbp2                                                     | Amyloid- $\beta$ -precursor-protein (cytoplasmic tail)-binding protein 2                                      | Mm.271997       | CX570630              |
| Arf1                                                       | ADP ribosylation factor 1                                                                                     | Rn.93735        | CX570644              |
| Arf3                                                       | ADP ribosylation factor 3                                                                                     | Rn.106440       | CX570112              |
| Arf4                                                       | ADP ribosylation factor 4                                                                                     | Rn.35935        | CX570339              |
| Arl1                                                       | ADP-ribosylation-factor-like 1                                                                                | Rn.3065         | CX570254              |
| Arnt1                                                      | Aryl hydrocarbon receptor nuclear-translocator-like                                                           | Rn.14532        | CX569745              |
| Atp1a1                                                     | ATPase, Na <sup>+</sup> /K <sup>+</sup> transporting, $\alpha$ 1                                              | Rn.2992         | CX569887              |
| Atp1b3                                                     | ATPase, Na <sup>+</sup> /K <sup>+</sup> transporting, $\beta$ 3-polypeptide                                   | Rn.5041         | CX570512              |
| ATP5C1                                                     | ATP synthase, H <sup>+</sup> transporting, mitochondrial F1 complex, $\gamma$ -polypeptide 1 (human or mouse) | Rn.63959        | CX569265              |
| ATP5g3                                                     | ATP synthase, H <sup>+</sup> transporting, mitochondrial F0 complex, subunit c (subunit 9) isoform 3          | Rn.2180         | CX569532              |
| Atp6s14                                                    | ATPase, vacuolar, 14 kDa                                                                                      | Rn.6167         | CX570076              |
| Bet1                                                       | Blocked early in transport 1 homolog ( <i>Saccharomyces cerevisiae</i> )                                      | Rn.3953         | CX569346, CX569657    |
| Bin3                                                       | Bridging integrator 3                                                                                         | Mm.24186        | CX569642              |

**Table 2** (continued)

| Gene symbol | Description                                                                                                                                                                                           | Unigene cluster | Genbank accession No.              |
|-------------|-------------------------------------------------------------------------------------------------------------------------------------------------------------------------------------------------------|-----------------|------------------------------------|
| Cfh         | Complement component factor h                                                                                                                                                                         | Rn.101777       | CX570315,<br>CX570341              |
| Cacna1a     | Calcium channel, voltage-dependent, P/Q type, $\alpha$ 1A-subunit                                                                                                                                     | Rn.87769        | CX570139                           |
| Cacna1d     | Calcium channel, voltage-dependent, L type, $\alpha$ 1D-subunit                                                                                                                                       | Rn.89671        | CX569572                           |
| Camk2g      | Calcium/calmodulin-dependent protein kinase II $\gamma$ (mouse), calcium/calmodulin-dependent protein kinase (CaM kinase) II $\gamma$ (rat)                                                           | Rn.10961        | CX570070,<br>CX570371              |
| Cav2        | Caveolin 2, lipid-raft-associated                                                                                                                                                                     | Rn.81070        | CX570273                           |
| Cbl1        | Casitas B-lineage-lymphoma-like 1                                                                                                                                                                     | Mm.273270       | CX570449                           |
| Clcn2       | Chloride channel 2                                                                                                                                                                                    | Rn.11073        | CX569444,<br>CX570218,<br>CX570277 |
| Clns1a      | Chloride channel, nucleotide-sensitive, 1A                                                                                                                                                            | Rn.4089         | CX569358                           |
| Cpt1a       | Carnitine palmitoyltransferase 1, liver                                                                                                                                                               | Rn.2856         | CX569915                           |
| Cpt1b       | Carnitine palmitoyltransferase 1b                                                                                                                                                                     | Rn.6028         | CX570294                           |
| Dab2        | Disabled homolog 2 ( <i>Drosophila</i> )                                                                                                                                                              | Rn.14763        | CX570050                           |
| Dnch2       | Dynein, cytoplasmic, heavy chain 2                                                                                                                                                                    | Rn.44896        | CX570555                           |
| Dncl1       | Dynein, cytoplasmic, light intermediate chain 1                                                                                                                                                       | Mm.128627       | CX570329                           |
| Dst         | Dystonin                                                                                                                                                                                              | Mm.33625        | CX569627                           |
| Ecac1       | Epithelial calcium channel 1                                                                                                                                                                          | Rn.12948        | CX569588,<br>CX570541              |
| Elmo3       | Engulfment and cell motility 3, ced-12 homolog ( <i>Caenorhabditis elegans</i> )                                                                                                                      | Mm.237966       | CX569114                           |
| ERBB2IP     | ErbB2-interacting protein                                                                                                                                                                             | Hs.519346       | CX569874                           |
| Erp29       | Endoplasmic reticulum protein 29                                                                                                                                                                      | Rn.32904        | CX569415                           |
| Fxyd6       | FXD-domain-containing ion transport regulator 6                                                                                                                                                       | Rn.839          | CX570067                           |
| Gabt1       | GABA transporter protein                                                                                                                                                                              | Rn.10035        | CX570929                           |
| GOLGA7      | Golgi autoantigen, golgin subfamily a, 7                                                                                                                                                              | Hs.7953         | CX570696                           |
| Gira2       | Glycine receptor, $\alpha$ 2-subunit                                                                                                                                                                  | Rn.10379        | CX569486,<br>CX569486              |
| Gria4       | Glutamate receptor, ionotropic, AMPA4 ( $\alpha$ 4)                                                                                                                                                   | Rn.10938        | CX570526                           |
| Grid2       | Glutamate receptor, ionotropic, $\delta$ 2                                                                                                                                                            | Rn.10046        | CX569929                           |
| Grin1a      | Glutamate receptor, ionotropic                                                                                                                                                                        | Rn.3796         | CX569222                           |
| Gsk3b       | Glycogen synthase kinase $\beta$ 3                                                                                                                                                                    | Rn.10426        | CX569788                           |
| Heph        | Hephaestin                                                                                                                                                                                            | Rn.43849        | CX570368,<br>CX570400              |
| KCNA6       | Potassium voltage-gated channel, shaker-related subfamily, member 6                                                                                                                                   | Rn.64494        | CX569988                           |
| Kcnc2       | Potassium voltage-gated channel, Shaw-related subfamily, member                                                                                                                                       | Rn.9733         | CX570895                           |
| Kcne1       | Potassium voltage-gated channel, Isk-related subfamily, member 1, in humans mutations in this gene result in Jervell and Lange-Nielson syndrome (JLNS2); also involved with renal potassium transport | Rn.9734         | CX569446                           |
| Kcnh1       | Potassium voltage-gated channel, subfamily H (eag-related), member 1                                                                                                                                  | Rn.11071        | CX570577                           |
| Kcnj13      | Potassium inwardly rectifying channel, subfamily J, member 1                                                                                                                                          | Rn.14516        | CX569724                           |
| Kctd15      | Potassium channel tetramerization-domain-containing 15                                                                                                                                                | Mm.214380       | CX571084                           |
| Kpna3       | Karyopherin (importin) $\alpha$ 3                                                                                                                                                                     | Mm.25545        | CX570042                           |
| Kpn1        | Karyopherin (importin) $\beta$ 1                                                                                                                                                                      | Rn.11061        | CX570834                           |
| Ldlr        | Low-density lipoprotein receptor                                                                                                                                                                      | Rn.10483        | CX569181                           |
| LRP6        | Low-density-lipoprotein-receptor-related protein 6                                                                                                                                                    | Hs.210343       | CX569847,<br>CX569991              |
| M6pr        | Mannose-6-phosphate receptor, cation-dependent                                                                                                                                                        | Mm.249225       | CX569149                           |
| Madh4       | MAD homolog 4 ( <i>Drosophila</i> )                                                                                                                                                                   | Rn.9774         | CX570506                           |
| Osbpl1a     | Oxysterol-binding-protein-like 1A                                                                                                                                                                     | Rn.19665        | CX570244                           |
| Pkd1        | Polycystic kidney disease 1 homolog                                                                                                                                                                   | Rn.64559        | CX569928                           |
| Pkd2        | Polycystic kidney disease 2                                                                                                                                                                           | Mm.6442         | CX571081                           |
| Prkar2a     | Protein kinase, cAMP-dependent regulatory, type II $\alpha$                                                                                                                                           | Rn.9742         | CX570109                           |
| Psm1        | Proteasome (prosome, macropain) subunit, $\alpha$ type 1                                                                                                                                              | Rn.2668         | CX569498                           |



**Table 2** (continued)

| Gene symbol | Description                                                                                                 | Unigene cluster | Genbank accession No.        |
|-------------|-------------------------------------------------------------------------------------------------------------|-----------------|------------------------------|
| Rab1        | <i>ras</i> -related protein (rat), RAB1, member RAS oncogene family (mouse)                                 | Rn.106743       | CX569849, CX570178           |
| Rab12       | RAB12, member RAS oncogene family                                                                           | Rn.11021        | CX570389                     |
| Rab21       | RAB21, member RAS oncogene family                                                                           | Rn.13001        | CX570891                     |
| Rab33b      | RAB33B, member RAS oncogene family                                                                          | Mm.1664         | CX570148                     |
| Rab7        | RAB7, member RAS oncogene family                                                                            | Rn.1425         | CX569615                     |
| Ralbp1      | ralA-binding protein 1                                                                                      | Rn.7107         | CX570030                     |
| Ralgds      | Ras association (RalGDS/AF-6) domain family 4 (mouse), ral guanine nucleotide dissociation stimulator (rat) | Rn.40174        | CX569767                     |
| Ran         | RAN, member RAS oncogene family                                                                             | Rn.107698       | CX571034                     |
| RAP-1A      | Ras-related protein RAP-1A                                                                                  | Rn.106321       | CX570846, CX570920           |
| Rph3a       | Rabphilin 3A                                                                                                | Rn.10976        | CX570804                     |
| Scamp1      | Secretory carrier membrane protein 1                                                                        | Rn.20374        | CX570429                     |
| Scamp3      | Secretory carrier membrane protein 3                                                                        | Rn.98518        | CX569482                     |
| Scn1a       | Sodium channel, voltage-gated, type 1, $\alpha$ -polypeptide                                                | Rn.32079        | CX570659                     |
| Sec23b      | SEC23B ( <i>Saccharomyces cerevisiae</i> )                                                                  | Rn.8735         | CX569808                     |
| SLC3A1      | Solute carrier organic anion transporter family, member 3A1                                                 | Rn.11196        | CX569289                     |
| Slc4a4      | Solute carrier family 4, member 4                                                                           | Mm.41044        | CX569317                     |
| Slc7a1      | Solute carrier family 7, member 1                                                                           | Rn.9439         | CX569652                     |
| Slc9a6      | Solute carrier family 9 (sodium/hydrogen exchanger), isoform 6                                              | Mm.17815        | CX570784                     |
| Slc12a2     | Solute carrier family 12, member 2                                                                          | Rn.11523        | CX570528                     |
| SLC12A5     | Solute carrier family 12, (potassium-chloride transporter) member 5                                         | Rn.10513        | CX570132                     |
| Slc12a7     | Solute carrier family 12, member 7                                                                          | Mm.275800       | CX569350                     |
| Slc13a3     | Solute carrier family 13 (sodium-dependent dicarboxylate transporter), member 3                             | Rn.3587         | CX570545                     |
| Slc16a1     | Solute carrier family 16, member 1                                                                          | Rn.6085         | CX570720                     |
| Slc22a6     | Solute carrier family 22, member 6                                                                          | Rn.87849        | CX570269, CX570289           |
| SMC1L1      | SMC1 (structural maintenance of chromosomes 1)-like 1 (yeast)                                               | Rn.11763        | CX570710                     |
| Snag1       | Sorting-nexin-associated Golgi protein 1                                                                    | Mm.33721        | CX570588                     |
| Snx1        | Sorting nexin 1                                                                                             | Rn.2785         | CX571038                     |
| Snx10       | Sorting nexin 10                                                                                            | Mm.294166       | CX570331                     |
| Snx15       | Sorting nexin 15                                                                                            | Mm.329629       | CX569431                     |
| Snx4        | Sorting nexin 4                                                                                             | Mm.28196        | CX570764                     |
| Snx9        | Sorting nexin 9                                                                                             | Mm.89515        | CX570161, CX570795           |
| Stg         | Small glutamine-rich tetratricopeptide-repeat (TPR)-containing protein                                      | Rn.9655         | CX571036                     |
| Stk38l      | Serine/threonine-kinase-38-like                                                                             | Mm.32212        | CX570718                     |
| Sypl        | Synaptophysin-like protein                                                                                  | Mm.80919        | CX570044                     |
| Syt1        | Synaptotagmin 1                                                                                             | Rn.7596         | CX570599                     |
| Tfrc        | Transferrin receptor                                                                                        | Rn.98672        | CX570856                     |
| Timm17a     | Translocator of inner mitochondrial membrane 17a (yeast)                                                    | Rn.22514        | CX570827                     |
| Tmc6        | Transmembrane-channel-like gene family 6                                                                    | Mm.286963       | CX569650                     |
| Tob1        | Transducer of ERBB2, 1                                                                                      | Rn.7819         | CX570708                     |
| Tram1       | Translocating chain-associating membrane protein 1                                                          | Rn.104193       | CX569235                     |
| Trpc3       | Transient receptor protein 3                                                                                | Rn.45385        | CX569857, CX569927           |
| Ttpa        | Tocopherol ( $\alpha$ ) transfer protein                                                                    | Rn.64565        | CX570237                     |
| Tuba4       | Tubulin, $\alpha$ 4                                                                                         | Mm.1155         | CX570937                     |
| Tubg1       | Tubulin, $\gamma$ 1                                                                                         | Rn.8218         | CX570794                     |
| Ubl4        | Ubiquitin-like 4                                                                                            | Mm.3979         | CX569296                     |
| Vps26       | Vacuolar protein sorting 26 (yeast)                                                                         | Mm.260703       | CX569584                     |
| Vps35       | Vacuolar protein sorting 35                                                                                 | Rn.8419         | CX569258, CX570297, CX570740 |

**Table 2** (continued)

| Gene symbol                                                   | Description                                                                                     | Unigene cluster | Genbank accession No. |
|---------------------------------------------------------------|-------------------------------------------------------------------------------------------------|-----------------|-----------------------|
| Xpo1                                                          | Exportin 1 (CRM1, yeast, homolog)                                                               | Rn.34087        | CX570807              |
| Xpot                                                          | Exportin, tRNA (nuclear export receptor for tRNAs)                                              | Mm.25042        | CX570872              |
| Ywhab                                                         | Tyrosine 3-monooxygenase/tryptophan 5-monooxygenase activation protein, $\beta$ -polypeptide    | Rn.8653         | CX569872              |
| Ywhae                                                         | Tyrosine 3-monooxygenase/tryptophan 5-monooxygenase activation protein, $\epsilon$ -polypeptide | Rn.4225         | CX569647              |
| Ywhag                                                         | Tyrosine 3-monooxygenase/tryptophan 5-monooxygenase activation protein, $\gamma$ -polypeptide   | Rn.29936        | CX569658              |
| Ywhaz                                                         | Tyrosine 3-monooxygenase/tryptophan 5-monooxygenase activation protein, $\zeta$ -polypeptide    | Rn.1292         | CX570313              |
| <i>Genes associated with RNA transcription and metabolism</i> |                                                                                                 |                 |                       |
| Adnp                                                          | Activity-dependent neuroprotective protein                                                      | Rn.48777        | CX569981              |
| Aebp2                                                         | AE-binding protein 2                                                                            | Mm.86453        | CX570037              |
| Arntl                                                         | Aryl hydrocarbon receptor nuclear-translocator-like                                             | Rn.14532        | CX569745              |
| Atf7ip                                                        | Activating-transcription-factor-7-interacting protein                                           | Mm.173271       | CX570608              |
| Atm                                                           | Ataxia telangiectasia mutated homolog (human)                                                   | Rn.98962        | CX570256              |
| Bat8                                                          | HLA-B-associated transcript 8                                                                   | Rn.116518       | CX569734              |
| Bpnt1                                                         | 3(2),5-bisphosphate nucleotidase                                                                | Rn.8453         | CX569645,<br>CX570358 |
| Bteb1                                                         | Basic transcription-element-binding protein 1                                                   | Rn.19481        | CX569601,<br>CX570034 |
| Cbx3                                                          | Chromobox homolog 3 ( <i>Drosophila</i> HP1 $\gamma$ )                                          | Mm.280968       | CX570135,<br>CX570414 |
| Ccnc                                                          | Cyclin C                                                                                        | Rn.106758       | CX569348              |
| Ccnl                                                          | Cyclin L                                                                                        | Rn.12962        | CX571099              |
| Cnot4                                                         | CCR4-NOT transcription complex, subunit 4                                                       | Mm.214525       | CX570571              |
| Col9a2                                                        | Procollagen, type IX, $\alpha$ 2                                                                | Mm.269384       | CX570928              |
| Cops2                                                         | COP9 (constitutive photomorphogenic) homolog, subunit 2 ( <i>Arabidopsis thaliana</i> )         | Rn.11556        | CX571022              |
| Cugbp2                                                        | CUG triplet repeat, RNA binding protein 2                                                       | Rn.30004        | CX570663              |
| DCPS                                                          | mRNA-decapping enzyme                                                                           | Rn.101986       | CX570864              |
| Dut                                                           | Deoxyuridine triphosphatase (dUTPase)                                                           | Rn.6102         | CX570340              |
| E2f6                                                          | E2F transcription factor 6                                                                      | Rn.79506        | CX571006              |
| Elf1                                                          | E74-like factor 1                                                                               | Rn.98640        | CX570394              |
| Esrrg                                                         | Estrogen-related receptor $\gamma$                                                              | Mm.89989        | CX570676              |
| Exosc1                                                        | Exosome component 1                                                                             | Mm.289086       | CX570213              |
| Foxo1A                                                        | Forkhead box O1, transcription factor                                                           | Rn.102196       | CX569970              |
| Gabpa                                                         | GA-binding protein transcription factor, $\alpha$ -subunit 60 kDa                               | Rn.76236        | CX569467              |
| Gabpb1                                                        | GA-repeat-binding protein, $\beta$ 1                                                            | Mm.293266       | CX570296              |
| Gtf2a1                                                        | General transcription factor IIA, 1                                                             | Rn.44436        | CX570522              |
| Hlf                                                           | Hepatic leukemia factor                                                                         | Mm.158903       | CX570949              |
| Hnrpf                                                         | Ribonucleoprotein F                                                                             | Rn.20143        | CX569723              |
| Hnrph2                                                        | Heterogeneous nuclear ribonucleoprotein H2                                                      | Mm.315909       | CX569144              |
| Hnrpk                                                         | Heterogeneous nuclear ribonucleoprotein K                                                       | Rn.11854        | CX570880              |
| Hnrpr                                                         | Heterogeneous nuclear ribonucleoprotein R                                                       | Rn.14947        | CX570301              |
| Irf2                                                          | Interferon-regulatory factor 2                                                                  | Mm.1149         | CX571096              |
| Irx2                                                          | Iroquois-related homeobox 2 ( <i>Drosophila</i> )                                               | Mm.28888        | CX569242              |
| Isl1                                                          | ISL1 transcription factor, LIM/homeodomain (islet 1)                                            | Rn.36202        | CX569363              |
| ISL2                                                          | Insulin-related protein 2 (islet 2)                                                             | Rn.10026        | CX571066              |
| Jarid1a                                                       | Jumonji, AT-rich interactive domain 1A (Rbp2-like)                                              | Mm.354889       | CX570120              |
| Lamp2                                                         | Lysosomal membrane glycoprotein 2                                                               | Rn.1722         | CX569410,<br>CX570657 |
| Lztr1                                                         | Leucine-zipper-like transcriptional regulator, 1                                                | Mm.161726       | CX570641              |
| Madh4                                                         | MAD homolog 4 ( <i>Drosophila</i> )                                                             | Rn.9774         | CX570506              |
| Mafb                                                          | v- <i>maf</i> musculoaponeurotic fibrosarcoma oncogene family, protein B (avian)                | Rn.10725        | CX569552              |

**Table 2** (continued)

| Gene symbol | Description                                                                                                        | Unigene cluster | Genbank accession No. |
|-------------|--------------------------------------------------------------------------------------------------------------------|-----------------|-----------------------|
| Me1         | Malic enzyme 1                                                                                                     | Rn.3519         | CX571055              |
| MEF2A       | Myocyte enhancer factor 2A                                                                                         | Hs.268675       | CX569192              |
| Mist1       | Muscle, intestine and stomach expression 1                                                                         | Rn.9897         | CX570103              |
| Mll         | Myeloid/lymphoid or mixed-lineage leukemia                                                                         | Rn.62341        | CX569305              |
| Msc         | Musculin                                                                                                           | Mm.5820         | CX569607              |
| Mtpn        | Myotrophin                                                                                                         | Rn.3239         | CX569183              |
| Nfia        | Nuclear factor I/A                                                                                                 | Rn.10550        | CX569764              |
| Nr1d1       | Nuclear receptor subfamily 1, group D, member 1                                                                    | Rn.29848        | CX569951              |
| Nr3c1       | Nuclear receptor subfamily 1, group D, member 1                                                                    | Rn.90070        | CX569719              |
| Pabpc1      | Poly(A)-binding protein, cytoplasmic 1                                                                             | Rn.29024        | CX570543              |
| PHF5A       | Transcription factor INI (human)                                                                                   | Hs.474980       | CX570115              |
| Polr2k      | Polymerase (RNA) II (DNA directed) polypeptide K                                                                   | Mm.27375        | CX570683              |
| Polr3e      | Polymerase (RNA) III (DNA directed) polypeptide E                                                                  | Mm.193632       | CX569125              |
| POLR3F      | Polymerase (RNA) III (DNA directed) polypeptide F, 39 kDa                                                          | Hs.472227       | CX570610              |
| Pou4f2      | POU domain, class 4, transcription factor 2                                                                        | Rn.92413        | CX570611              |
| Psip2       | PC4 and SFRS1-interacting protein 2                                                                                | Rn.93075        | CX570375              |
| Ptb         | Polypyrimidine-tract-binding protein                                                                               | Rn.64440        | CX569478,<br>CX569569 |
| Rab1        | RAB1, member RAS oncogene family (mouse), <i>ras</i> -related protein                                              | Rn.106743       | CX569849,<br>CX570178 |
| RAB2B       | RAB2B, member RAS oncogene family                                                                                  | Hs.22399        | CX570798              |
| Rab7        | RAB7, member RAS oncogene family                                                                                   | Rn.1425         | CX569615              |
| Rb1         | Retinoblastoma 1                                                                                                   | Rn.55115        | CX570185              |
| Rbl2        | Retinoblastoma-like 2                                                                                              | Rn.11020        | CX569140              |
| Rnase4      | Ribonuclease, RNase A family 4                                                                                     | Rn.1742         | CX569828,<br>CX570925 |
| Rnf14       | Ring finger protein 14                                                                                             | Mm.228903       | CX569704              |
| Rnf4        | Ring finger protein 4                                                                                              | Rn.30015        | CX570071              |
| Rngtt       | RNA guanylyltransferase and 5'-phosphatase                                                                         | Mm.240024       | CX571037,<br>CX571042 |
| Sfrs10      | Splicing factor, arginine/serine-rich (transformer 2 <i>Drosophila</i> homolog) 10                                 | Rn.8538         | CX570478,<br>CX570537 |
| Sfrs5       | Splicing factor, arginine/serine-rich 5                                                                            | Rn.54448        | CX570862              |
| Sfrs8       | Splicing factor, arginine/serine-rich 8                                                                            | Mm.288714       | CX569522              |
| Sirt1       | Sirtuin 1 (silent mating type information regulation 2, homolog) 1 ( <i>Saccharomyces cerevisiae</i> )             | Rn.42098        | CX570156,<br>CX571017 |
| Six1        | Sine-oculis-related homeobox 1 homolog ( <i>Drosophila</i> )                                                       | Rn.94813        | CX570649,<br>CX570675 |
| Smarca1     | SWI/SNF-related, matrix-associated, actin-dependent regulator of chromatin, subfamily a, member 1                  | Mm.229151       | CX570664              |
| Smarca3     | SWI/SNF-related, matrix-associated, actin-dependent regulator of chromatin, subfamily a, member 3                  | Mm.209150       | CX569578              |
| Smcf1       | Transcription factor 1 (human)                                                                                     | Rn.22598        | CX570212              |
| Sox17       | SRY-box-containing gene 17                                                                                         | Mm.279103       | CX570427              |
| Sprn        | Double-stranded-RNA-binding protein p74                                                                            | Rn.98476        | CX569844              |
| Ssrp1       | Structure-specific recognition protein                                                                             | Rn.35908        | CX570924              |
| Stat5b      | Signal transducer and activator of transcription 5B                                                                | Rn.54486        | CX569699              |
| STRAP       | Similar to UNR-interacting protein [serine-threonine-kinase-receptor-associated protein (STRAP)] (LOC297699), mRNA | Hs.504895       | CX570661              |
| Syncrip     | Synaptotagmin-binding, cytoplasmic-RNA-interacting protein                                                         | Mm.260545       | CX570279              |
| TAF13       | TAF13 RNA polymerase II, TATA-box-binding-protein (TBP)-associated factor ( <i>Mus musculus</i> )                  | Hs.502508       | CX569395              |
| Taf4a       | TAF4A RNA polymerase II, TATA-box-binding-protein (TBP)-associated factor                                          | Mm.235542       | CX569230              |
| Tbl1x       | Hepatic leukemia factor                                                                                            | Mm.258476       | CX571057              |
| Tceb1       | Transcription elongation factor B (SIII), polypeptide 1                                                            | Rn.5996         | CX570147              |



**Table 2** (continued)

| Gene symbol                                                                                          | Description                                                                                          | Unigene cluster | Genbank accession No.        |
|------------------------------------------------------------------------------------------------------|------------------------------------------------------------------------------------------------------|-----------------|------------------------------|
| Tcf7                                                                                                 | Transcription factor 7 (T-cell specific, HMG box)                                                    | Mm.3163         | CX569558                     |
| Thrap2                                                                                               | Thyroid-hormone-receptor-associated protein 2                                                        | Mm.206238       | CX570989                     |
| Trpc3                                                                                                | Transient receptor protein 3                                                                         | Rn.45385        | CX569857, CX569927           |
| Vars2                                                                                                | Valyl-tRNA synthetase 2                                                                              | Rn.12314        | CX570841                     |
| YT521                                                                                                | Splicing factor YT521-B                                                                              | Rn.48752        | CX569190                     |
| Zdhhc2                                                                                               | Zinc finger, DHHC-domain-containing 2                                                                | Rn.17310        | CX569994, CX570636           |
| Zfhx1b                                                                                               | Zinc finger homeobox 1b                                                                              | Mm.259595       | CX570048                     |
| Zfp162                                                                                               | Zinc finger protein 162                                                                              | Rn.1074         | CX569903                     |
| Zfp191                                                                                               | Zinc finger protein 191                                                                              | Rn.44991        | CX569273                     |
| Zfp260                                                                                               | Zinc finger protein 260                                                                              | Rn.98773        | CX569165                     |
| Zfp3611                                                                                              | Zinc finger protein 36, C3H-type-like 1                                                              | Rn.6142         | CX569763, CX571117           |
| Zfp426                                                                                               | Zinc finger protein 426                                                                              | Mm.297660       | CX570523                     |
| Zfp68                                                                                                | Zinc finger protein 68                                                                               | Mm.27575        | CX569651                     |
| Zfx                                                                                                  | Zinc finger protein-X-linked                                                                         | Mm.919          | CX569105                     |
| Zhx1                                                                                                 | Zinc fingers and homeoboxes 1                                                                        | Rn.16902        | CX570260                     |
| Znf265                                                                                               | Zinc finger protein 265                                                                              | Rn.11361        | CX569154                     |
| <i>Genes associated with cell proliferation, neurogenesis, cell growth and programmed cell death</i> |                                                                                                      |                 |                              |
| Abi1                                                                                                 | Abl-interactor 1, regulation of actin dynamics, has overlapping SNARE domain                         | Rn.24800        | CX570640                     |
| Actr2                                                                                                | ARP2 actin-related protein 2 homolog (yeast)                                                         | Mm.259045       | CX569158, CX569343, CX570437 |
| Ahi1                                                                                                 | Ahi-1 may play important role in signal transduction and may be involved in tumor development        | Rn.236737       | CX570625                     |
| Ank2                                                                                                 | Ankyrin 2, brain, implicated in development of long QT syndrome (Jervell and Lange-Nielson syndrome) | Rn.71011        | CX569484, CX569582, CX570542 |
| Anln                                                                                                 | Anillin, actin-binding protein (scraps homolog, <i>Drosophila</i> )                                  | Mm.282751       | CX569784                     |
| Anxa7                                                                                                | Annexin A7, Ca <sup>2+</sup> -binding protein, Ca <sup>2+</sup> -signaling process                   | Rn.106184       | CX569433, CX570854           |
| Api5                                                                                                 | Apoptosis inhibitor 5                                                                                | Mm.181824       | CX569195                     |
| App                                                                                                  | Amyloid $\beta$ (A4) precursor protein                                                               | Rn.2104         | CX570008                     |
| Asah2                                                                                                | N-acylsphingosine amidohydrolase 2                                                                   | Rn.22738        | CX570687, CX570892           |
| Atm                                                                                                  | Ataxia telangiectasia mutated homolog (human)                                                        | Rn.98962        | CX570256                     |
| Bmi1                                                                                                 | B lymphoma Mo-MLV insertion region 1 (mouse)                                                         | Mm.289584       | CX570285, CX570142           |
| Camk2g                                                                                               | Calcium/calmodulin-dependent protein kinase (CaM kinase) II $\gamma$                                 | Rn.10961        | CX570371                     |
| Catnb                                                                                                | Catenin $\beta$ , associated with cell proliferation in vestibular epithelia                         | Rn.112601       | CX570119                     |
| Ccnc                                                                                                 | Cyclin C, involved in cell cycle reentry                                                             | Rn.106758       | CX569348                     |
| Ccng1                                                                                                | Cyclin G1                                                                                            | Rn.5834         | CX569833                     |
| Ccni                                                                                                 | Cyclin I                                                                                             | Mm.250419       | CX570514                     |
| Cdc37                                                                                                | Cell division cycle 37 homolog ( <i>Saccharomyces cerevisiae</i> )-like                              | Rn.17982        | CX570717                     |
| Cdc42                                                                                                | Cell division cycle 42 homolog ( <i>Saccharomyces cerevisiae</i> ), Cdc42 GTPase-activating protein  | Rn.60067        | CX570916                     |
| Cdk5                                                                                                 | Cyclin-dependent kinase 5 (Cdk5)                                                                     | Rn.10749        | CX569253                     |
| Cetn2                                                                                                | Centrin 2, calcium-binding protein, duplication and segregation of the centrosome                    | Rn.9472         | CX570323                     |
| Cfl2                                                                                                 | Cofilin 2, muscle                                                                                    | Mm.276826       | CX570425, CX570573           |
| CGI-121                                                                                              | CGI-121 protein, PRPK (p53-related protein kinase)-binding protein                                   | Hs.157401       | CX570314                     |
| Chrdl1                                                                                               | Chordin-like 1                                                                                       | Mm.157697       | CX569787                     |
| CKLFSF5                                                                                              | Chemokine-like factor superfamily 5 (LOC290214)                                                      | Hs.99272        | CX569344                     |

**Table 2** (continued)

| Gene symbol | Description                                                                                                                          | Unigene cluster | Genbank accession No.                                        |
|-------------|--------------------------------------------------------------------------------------------------------------------------------------|-----------------|--------------------------------------------------------------|
| Cks1        | CDC28 protein kinase 1                                                                                                               | Mm.3049         | CX570033                                                     |
| Col1a2      | Procollagen, type I, $\alpha$ 2                                                                                                      | Rn.107239       | CX569233                                                     |
| Col27a1     | Procollagen, type XXVII, $\alpha$ 1                                                                                                  | Rn.53800        | CX569339                                                     |
| Col5a2      | Procollagen, type V, $\alpha$                                                                                                        | Rn.2875         | CX570287                                                     |
| Col6a3      | Procollagen, type VI, $\alpha$                                                                                                       | Mm.7562         | CX571091                                                     |
| Col8a1      | Procollagen, type VIII, $\alpha$ 1                                                                                                   | Mm.130388       | CX570262                                                     |
| Cops2       | COP9 (constitutive photomorphogenic) homolog, subunit 2 ( <i>Arabidopsis thaliana</i> )                                              | Rn.11556        | CX571022                                                     |
| CORO2B      | Coronin, actin-binding protein, 2B                                                                                                   | Hs.24907        | CX570038                                                     |
| Crk         | Crk sarcoma virus CT10 oncogene homolog (avian)                                                                                      | Rn.96136        | CX569340                                                     |
| Cxadr       | Coxsackievirus and adenovirus receptor                                                                                               | Rn.92354        | CX569477                                                     |
| Cxcl12      | Chemokine (C-X-C motif) ligand 12                                                                                                    | Rn.54439        | CX570639                                                     |
| Cycs        | Cytochrome c, somatic                                                                                                                | Rn.2202         | CX569492                                                     |
| Dcn         | Decorin, small leucine-rich proteoglycan, binds to collagen                                                                          | Rn.106103       | CX569188                                                     |
| DIP13B      | Dip3 $\beta$                                                                                                                         | Hs.506603       | CX570163                                                     |
| Dst         | Dystonin                                                                                                                             | Mm.336625       | CX569627                                                     |
| E2f6        | E2F transcription factor 6                                                                                                           | Rn.79506        | CX571006                                                     |
| Elmo3       | Engulfment and cell motility 3, ced-12 homolog ( <i>Caenorhabditis elegans</i> )                                                     | Hs.7953         | CX569114                                                     |
| Emp3        | Epithelial membrane protein 3                                                                                                        | Rn.6782         | CX571058                                                     |
| Facl6       | Fatty acid coenzyme A ligase, long chain 6                                                                                           | Rn.33697        | CX569632,<br>CX570126                                        |
| Fgf10       | Fibroblast growth factor 10                                                                                                          | Rn.44439        | CX569707                                                     |
| Fgf12       | Fibroblast growth factor 12                                                                                                          | Rn.45965        | CX569312,<br>CX569884,<br>CX570064,<br>CX570483,<br>CX570498 |
| FRK         | Src-related tyrosine kinase                                                                                                          | Rn.10556        | CX569559                                                     |
| Gas1        | Growth-arrest-specific 1                                                                                                             | Mm.22701        | CX569715                                                     |
| Gas2        | Growth-arrest-specific 2                                                                                                             | Rn.124724       | CX569331                                                     |
| Gdap1       | Ganglioside-induced differentiation-associated protein 1                                                                             | Rn.10426        | CX570490,<br>CX570961                                        |
| Gsk3b       | Glycogen synthase kinase 3 $\beta$                                                                                                   | Rn.10426        | CX569788                                                     |
| Has3        | Hyaluronan synthase 3                                                                                                                | Rn.91135        | CX569718                                                     |
| HGF         | Hepatocyte growth factor (hepapoietin A; scatter factor)                                                                             | Rn.10468        | CX569659                                                     |
| Hprt        | Hypoxanthine guanine phosphoribosyl transferase                                                                                      | Rn.47           | CX569790                                                     |
| HRPAP20     | Hormone-regulated proliferation-associated 20-kDa protein                                                                            | Rn.106694       | CX569836                                                     |
| Igf2        | Insulin-like growth factor 2                                                                                                         | Rn.964          | CX570027                                                     |
| Igfbp3      | Insulin-like-growth-factor-binding protein 3                                                                                         | Rn.26369        | CX570134                                                     |
| Igfbp6      | Insulin-like-growth-factor-binding protein 6                                                                                         | Rn.6431         | CX570622                                                     |
| Igsf4a      | Immunoglobulin superfamily, member 4A                                                                                                | Mm.234832       | CX569946,<br>CX570882                                        |
| Il15        | Interleukin 15                                                                                                                       | Rn.2490         | CX570692                                                     |
| Inexa       | Internexin $\alpha$ , neuronal intermediate filament (NIF) protein, in CNS can be involved with NIF inclusion diseases (NIFID)       | Rn.88941        | CX569775                                                     |
| Lamc1       | Laminin, $\gamma$ 1                                                                                                                  | Rn.7145         | CX570004,<br>CX571039                                        |
| Lats2       | Large tumor suppressor                                                                                                               | Mm.347899       | CX570275,<br>CX570295                                        |
| Lfg         | Lifeguard, neural membrane protein 35 (NMP35), plays role in Fas-mediated cell death, colocalizes with GluR2 (postsynaptic membrane) | Rn.21679        | CX570940                                                     |
| Mab2111     | Mab-21-like 1 ( <i>Caenorhabditis elegans</i> )                                                                                      | Mm.252244       | CX569364                                                     |
| Madd        | MAP-kinase-activating death domain                                                                                                   | Rn.90117        | CX570750                                                     |
| Mapk4       | Mitogen-activated protein kinase 4                                                                                                   | Rn.92317        | CX570433                                                     |
| MAPK8IP3    | Mitogen-activated protein kinase 8                                                                                                   | Hs.207763       | CX569515                                                     |

**Table 2** (continued)

| Gene symbol | Description                                                                                                                                     | Unigene cluster | Genbank accession No.                                                |
|-------------|-------------------------------------------------------------------------------------------------------------------------------------------------|-----------------|----------------------------------------------------------------------|
| Mina        | Myc-induced nuclear antigen                                                                                                                     | Rn.77753        | CX570081, CX570322                                                   |
| Mmp23       | Matrix metalloproteinase 23                                                                                                                     | Rn.22562        | CX570316                                                             |
| Mobp        | Myelin-associated oligodendrocytic basic protein                                                                                                | Rn.91185        | CX570716                                                             |
| Mrt1        | PDZ protein Mrt1                                                                                                                                | Rn.7581         | CX570962                                                             |
| Myliip      | Myosin-regulatory light-chain-interacting protein                                                                                               | Mm.212855       | CX569366, CX570883                                                   |
| MYR8        | Myosin heavy-chain Myr 8                                                                                                                        | Hs.368522       | CX569610                                                             |
| Nbn         | Nibrin, heterozygous Nbn-knockout mice develop tumors, animal model of Nijmegen breakage syndrome (NBS1 mutation)                               | Rn.25214        | CX570587                                                             |
| Negr1       | Neuronal growth regulator 1                                                                                                                     | Rn.42884        | CX569591                                                             |
| Neurodap1   | Protein carrying the RING-H2 sequence motif                                                                                                     | Rn.18446        | CX570491                                                             |
| Nf1         | Neurofibromatosis 1, Ras GTPase-activating protein (Ras-GAP) neurofibromin                                                                      | Rn.10686        | CX571140                                                             |
| Nfia        | Nuclear factor I/A                                                                                                                              | Rn.10550        | CX569764                                                             |
| NIPA2       | Nonimprinted in Prader-Willi/Angelman syndrome 2, putative polypeptide with 9 transmembrane domains, suggesting receptor or transport function  | Hs.370367       | CX569221                                                             |
| Pcdha13     | Protocadherin $\alpha$ 13                                                                                                                       | Rn.22308        | CX569332                                                             |
| Pin1        | Protein (peptidyl-prolyl cis/trans isomerase) NIMA-interacting 1                                                                                | Mm.296604       | CX571119                                                             |
| Pkd1        | Polycystic kidney disease 1 homolog                                                                                                             | Rn.64559        | CX569928                                                             |
| Pkd2        | Polycystin 2 (nonselective cation channel), polycystic kidney disease 2                                                                         | Mm.6442         | CX571081                                                             |
| Plp         | Proteolipid protein, modulates viability and phenotype of neurons                                                                               | Rn.4550         | CX569916, CX570186, CX570335, CX570377, CX570575, CX570681, CX570850 |
| POLA2       | DNA polymerase $\alpha$ -subunit II                                                                                                             | Rn.31773        | CX569342                                                             |
| Pold3       | Polymerase (DNA-directed), $\delta$ 3, accessory subunit                                                                                        | Mm.37562        | CX570399, CX570453                                                   |
| Pou4f2      | POU domain, class 4, transcription factor 2                                                                                                     | Rn.92413        | CX570611                                                             |
| Ppp1cb      | Protein phosphatase 1, catalytic subunit, $\beta$ -isoforms                                                                                     | Rn.39034        | CX569837                                                             |
| Ppp2ca      | Protein phosphatase 2a, catalytic subunit, $\alpha$ -isoforms                                                                                   | Rn.1271         | CX569267, CX569924, CX570152                                         |
| Ppp6c       | Protein phosphatase 6, catalytic subunit                                                                                                        | Rn.9573         | CX570150                                                             |
| Prkar1a     | Protein kinase, cAMP-dependent regulatory, type I, $\alpha$                                                                                     | Rn.10990        | CX570249                                                             |
| Prkar2b     | Protein kinase, cAMP-dependent regulatory, type II, $\beta$                                                                                     | Rn.4075         | CX569141                                                             |
| Prkrir      | Protein kinase, interferon-inducible double-stranded RNA-dependent inhibitor, repressor of (P58 repressor)                                      | Mm.4428         | CX569327                                                             |
| Ptn         | Pleiotrophin, highly expressed in neural stem (progenitor) cells of mouse ventral mesencephalon and promotes production of dopaminergic neurons | Rn.1653         | CX569602                                                             |
| Ptpn16      | Protein tyrosine phosphatase, nonreceptor type 16                                                                                               | Rn.98260        | CX569577                                                             |
| Ptpnz1      | Protein tyrosine phosphatase, receptor type, Z polypeptide 1                                                                                    | Rn.10088        | CX569387                                                             |
| Qk          | Quaking, required for formation of myelin                                                                                                       | Mm.311104       | CX570642                                                             |
| Raf1        | Murine leukemia viral ( <i>v-raf-1</i> ) oncogene homolog 1 (3611-MSV)                                                                          | Rn.33262        | CX570533                                                             |
| Ran         | RAN, member RAS oncogene family                                                                                                                 | Rn.107698       | CX571034                                                             |
| Rb1         | Retinoblastoma 1                                                                                                                                | Rn.55115        | CX570185                                                             |
| Rbl2        | Retinoblastoma-like 2                                                                                                                           | Rn.11020        | CX569140                                                             |
| Rsn         | Restin, trafficking micropinosomes to cytoskeleton                                                                                              | Rn.22069        | CX570815                                                             |
| SASH1       | SAM- and SH3-domain-containing 1                                                                                                                | Hs.193133       | CX569194                                                             |
| SCAP2       | Src-family-associated phosphoprotein 2                                                                                                          | Rn.17562        | CX570193                                                             |
| Sema3d      | Sema domain, immunoglobulin domain (Ig), short basic domain, secreted (semaphorin), 3D                                                          | Mm.89313        | CX571016                                                             |
| Sesn3       | Sestrin 3, gene-family-related to p53-activated gene 26                                                                                         | Mm.325126       | CX570660                                                             |

**Table 2** (continued)

| Gene symbol | Description                                                                                            | Unigene cluster | Genbank accession No. |
|-------------|--------------------------------------------------------------------------------------------------------|-----------------|-----------------------|
| Set         | SET translocation                                                                                      | Rn.105791       | CX570066              |
| Sgpp1       | Sphingosine-1-phosphate phosphatase 1                                                                  | Rn.8423         | CX569110, CX570138    |
| Shb         | Src-homology-2-domain-containing transforming protein B                                                | Mm.251716       | CX569708              |
| Sirt1       | Sirtuin 1 (silent mating type information regulation 2, homolog 1) ( <i>Saccharomyces cerevisiae</i> ) | Rn.42098        | CX570156, CX571017    |
| Skil        | SKI-like, ski is a unique proto-oncoprotein                                                            | Mm.15406        | CX570047, CX570409    |
| Slipr       | Scaffolding protein SLIPR                                                                              | Rn.22579        | CX570652              |
| SMC1L1      | SMC1 (structural maintenance of chromosomes 1)-like 1 (yeast)                                          | Rn.11763        | CX570710              |
| Snn         | Stannin, mediates selective toxicity of organotins                                                     | Rn.6147         | CX569153              |
| Spin        | Spindlin, interacts with spindle apparatus                                                             | Mm.188432       | CX569523              |
| Spnb1       | Spectrin $\beta$ 1                                                                                     | Mm.32881        | CX570971              |
| TAFA2       | TAFP proteins are distantly related to MIP-1 $\alpha$ , a member of the CC chemokine family            | Hs.269745       | CX570686              |
| Tcf7        | Transcription factor 7, T-cell specific                                                                | Mm.31630        | CX569558              |
| Thbs2       | Thrombospondin 2                                                                                       | Mm.26688        | CX570309              |
| Tial1       | Tial1 cytotoxic granule-associated RNA-binding-protein-like                                            | Rn.7555         | CX570516              |
| Tiam1       | T-cell lymphoma invasion and metastasis 1                                                              | Mm.124100       | CX570615              |
| Tm4sf9      | Transmembrane 4 superfamily member 9                                                                   | Rn.98240        | CX569145              |
| Tnfrsf11b   | Tumor necrosis factor receptor superfamily, member 11b (osteoprotegerin)                               | Rn.9792         | CX569855, CX570658    |
| Traf3       | Tnf-receptor-associated factor                                                                         | Mm.27431        | CX569503              |
| TRIP12      | Thyroid hormone receptor interactor 12                                                                 | Hs.368985       | CX569208              |
| Ugt8        | UDP-glucuronosyltransferase 8                                                                          | Rn.9744         | CX570079              |
| Vegfa       | Vascular endothelial growth factor A                                                                   | Mm.282184       | CX569472              |
| VG5Q        | Angiogenic factor VG5Q                                                                                 | Hs.213393       | CX570960              |
| Xpr1        | Xenotropic and polytropic retrovirus receptor 1                                                        | Mm.266215       | CX569667              |
| Zfp330      | Zinc finger protein 330                                                                                | Mm.269248       | CX570421              |
| Zic2        | Zic family member 2 (odd-paired homolog, <i>Drosophila</i> )                                           | Mm.358647       | CX569471              |

Genes with GO terms which can be categorized into the subheadings included are found in this table. The entire expression database for the Wackym-Soares normalized rat vestibular periphery cDNA library can be found in the Hearing and Balance Research Database (URL: <http://www.genexpression.info>).
