# Supplementary material
Source: publisher figshare collection journal article supplement (https://karger.figshare.com/articles/dataset/_/5104447)
Supplement: Supplementary file 3 [file 1]

Archive with 2 entries (2 files):
- table2.pdf
- table3.pdf
